# Supplementary material
Source: publisher figshare collection journal article supplement (https://frontiersin.figshare.com/ndownloader/files/26060447)
Supplement: Supplementary file [file 26060447]

Figure:S1

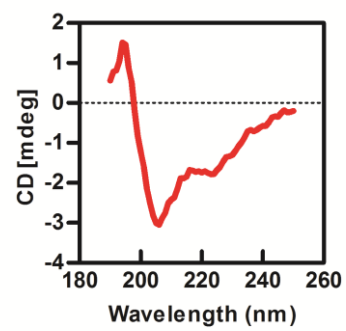

Figure:S2

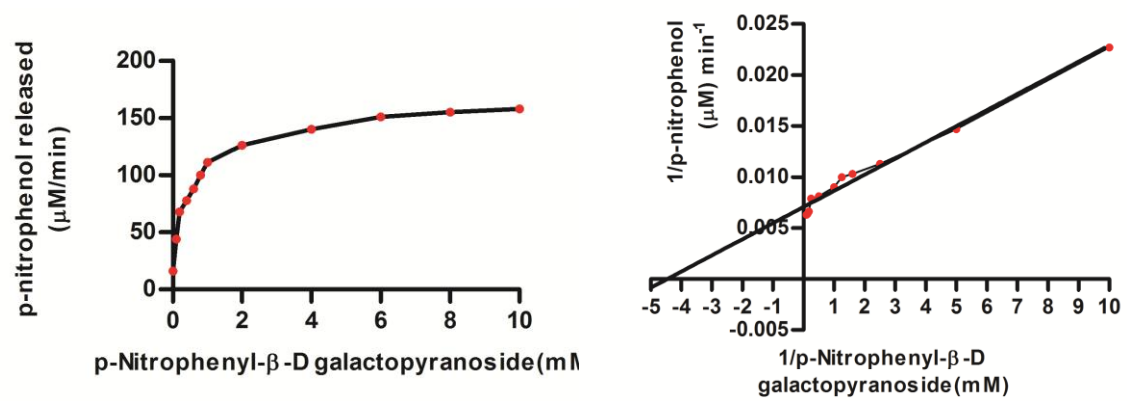

Figure:S3

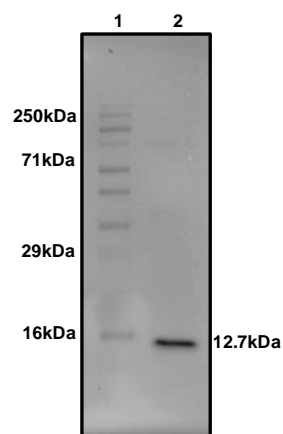

Figure:S4

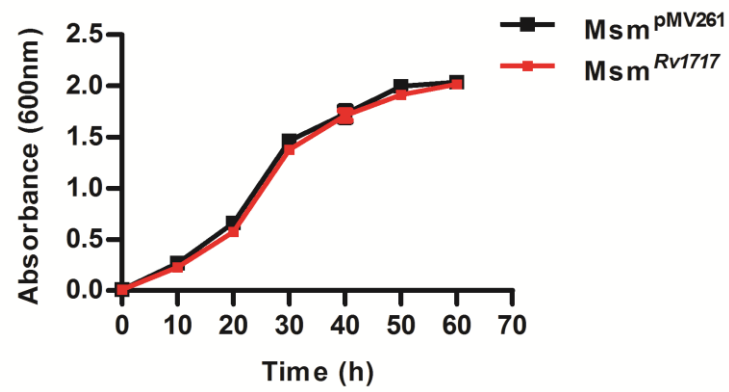

Figure:S5

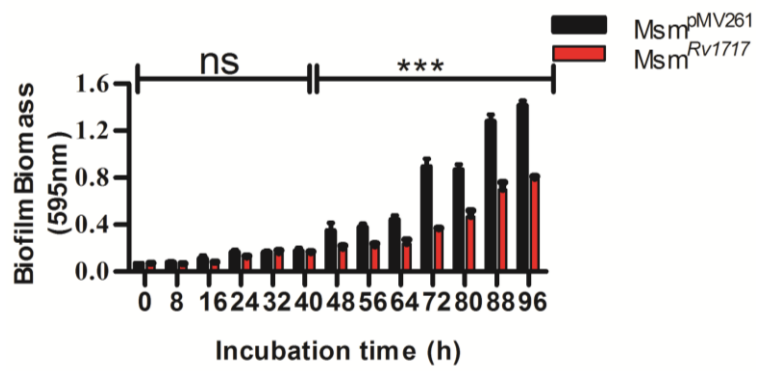

Figure:S6

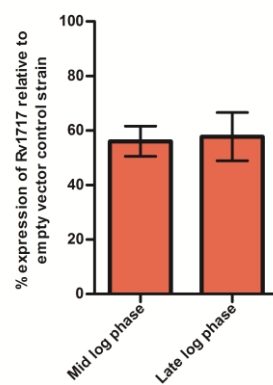

### S1-Table

### Primers used for expression of Rv1717 in *E. coli* (C41) expression strain

|             |                                  |
|-------------|----------------------------------|
| NheI1717F   | CTAGCTAGCATGAACTGACACGAGCGTCGCAG |
| XhoNSC1717R | CCGCTCGAGTGCCACCTCTGCAACCG       |

### Primers used for overexpression construct in pMV261

|                            |                                                      |
|----------------------------|------------------------------------------------------|
| Rv1717 <sup>HisTag</sup> F | CCGGAATTCATGAACTGACACGAGCGTCGCAGGCCCCCCA<br>GGTATGTG |
| Rv1717 <sup>HisTag</sup> R | CCCAAGCTTTCACTGGTGGTGGTGGTGGTGCGCTACCTCG<br>GCAACCGG |

### Primers used for Red fluorescent reporter construct

|             |                                                   |
|-------------|---------------------------------------------------|
| 1717+lin-F  | CGAGAGTAGGAATTCATGAACTGACACGAGCGTCG               |
| 1717+lin-R1 | CGCCGAGCCCGCCGAACCCGCCACCTCAGCAACCG               |
| 1717+lin-R2 | AAATTCACCTGACCCCGCCGCGAGCCCGCCGAACC               |
| Fred-Fn     | GGGTCAGGTGAATTTATGGTCTCGGAACTCATTAAGGAAAATA<br>TG |
| Fred-R      | GACATCGATAAGCTTTCATTTGCCGCCATCG                   |

### Primers used for Knock down construct in pMV261

|         |                             |
|---------|-----------------------------|
| KD1717F | CCCAAGCTTATGAACTGACACGAGCG  |
| KD1717R | CCGGAATTCTCACGCCACCTCTGCAAC |

### Primers used to confirm Knock down strain

|          |                       |
|----------|-----------------------|
| qKD1717F | ATGAAACTGACACGAGCGTCG |
| qKD1717R | CCCACCCAGAATCGCTCGGT  |
| SigA_F   | GTGACCCGGGAACGCAT     |

|        |                   |
|--------|-------------------|
| SigA_R | GTGAGCGGCTCGGATGG |
|--------|-------------------|

**S1.** Table. List of primers used in the study

## SUPPLEMENTARY FIGURE CAPTIONS

**Figure: S1** Normalized far-UV CD spectrum of Rv1717 protein recorded in phosphate buffer (pH 8.0) containing 100 mM NaCl. Spectrograms were averaged of three scans.

**Figure: S2 Determination of  $K_m$  and  $V_{max}$  values for pNP- $\beta$ -D-gal substrate (A)** Michaelis-Menten enzyme kinetics of Rv1717 **(B)** Double-reciprocal plot of the initial velocities against pNP- $\beta$ -D-gal. The values are average of three experiments.

**Figure: S3 Western blot analysis of expression of Rv1717 in *M. smegmatis*:** Expression of Rv1717 with a C-terminal 6xHis tag in *M. smegmatis* was confirmed by anti-6xHis tag antibody.

**Figure: S4** Growth curve of Msm<sup>pMV261</sup> and Msm<sup>Rv1717</sup> strains in MB7H9 broth supplemented with OADC, glycerol, tween 80 and kan. Data are representative of mean $\pm$ SD of three independent experiments.

**Figure: S5 Biofilm formation kinetics.** Msm<sup>Rv1717</sup> and Msm<sup>pMV261</sup> strains were grown in Sauton's medium in 96 well plates up to 4 days. Biofilm biomass was quantified by crystal violet assay at various time points as indicated. Data are representative of mean $\pm$ SD of three independent experiments.

**Figure: S6 Transcript analysis of *Rv1717* by quantitative reverse transcriptase PCR (qRT-PCR).** Total RNA was extracted from mid-log or late log phase cultures of

Mtb<sup>pMV261</sup> or Mtb<sup>KDRv1717</sup> in supplemented MB7H9 broth. *Rv1717* transcripts were estimated by quantitative RT-PCR. Percentage change in *Rv1717* transcripts in Mtb<sup>KDRv1717</sup> was calculated relative to the empty vector control strain (Mtb<sup>pMV261</sup>) by the  $2^{-\Delta\Delta Ct}$  method using *SigA* transcripts for normalization. The values plotted are the mean $\pm$ SD of three biological replicates.
